# Supplementary material for: Macrophages promote a profibrotic phenotype in orbital fibroblasts through increased hyaluronic acid production and cell contractility
Source: PubMed Central journal article supplement (PMC6610127; doi:10.1038/s41598-019-46075-1), 2019-07-03
Supplement: 41598_2019_46075_MOESM1_ESM.pdf [file 41598_2019_46075_MOESM1_ESM.pdf]

## Supplementary Information

**Macrophages promote a profibrotic phenotype in orbital fibroblasts through increased hyaluronic acid production and cell contractility**

I-Hui Yang<sup>1,4</sup>, Geoffrey E. Rose<sup>2</sup>, Daniel G. Ezra<sup>1,2,3</sup>, and Maryse Bailly<sup>1\*</sup>

<sup>1</sup> UCL Institute of Ophthalmology, London EC1V 9EL, UK.

<sup>2</sup> Department of Adnexal Surgery, Moorfields Eye Hospital, London EC1V 2PD, UK.

<sup>3</sup> NIHR Biomedical Research Centre for Ophthalmology, Moorfields Eye Hospital, City Road, London EC1V 2PD, UK.

<sup>4</sup> Department of Ophthalmology, Kaohsiung Chang Gung Memorial Hospital and Chang Gung University College of Medicine, Kaohsiung, Taiwan.

\* **Correspondence:** [m.bailly@ucl.ac.uk](mailto:m.bailly@ucl.ac.uk)

| Cell strain | Age | Gender | Surgical procedure         | GO duration (months) | CAS score |
|-------------|-----|--------|----------------------------|----------------------|-----------|
| HO1         | 71  | F      | Orbital decompression      | 15                   | 6         |
| HO2         | 60  | M      | Orbital decompression      | 8                    | 5         |
| HO4         | 49  | F      | Orbital decompression      | 7                    | 6         |
| HO6         | 58  | F      | Orbital decompression      | 9                    | 5         |
| CO4         | 49  | M      | Evisceration               | n/a                  | n/a       |
| CO5         | 80  | M      | Canthoplasty               | n/a                  | n/a       |
| CO6         | 56  | F      | Fat prolapse excision      | n/a                  | n/a       |
| CO7         | 33  | M      | Lacrimal gland exploration | n/a                  | n/a       |

**Supplementary Table S1.** Demographic data of tissue source for orbital fibroblasts. HOs were derived from patients with active GO undergoing orbital decompression surgery; COs were from control individuals undergoing orbital surgery unrelated to GO.

Figure S1

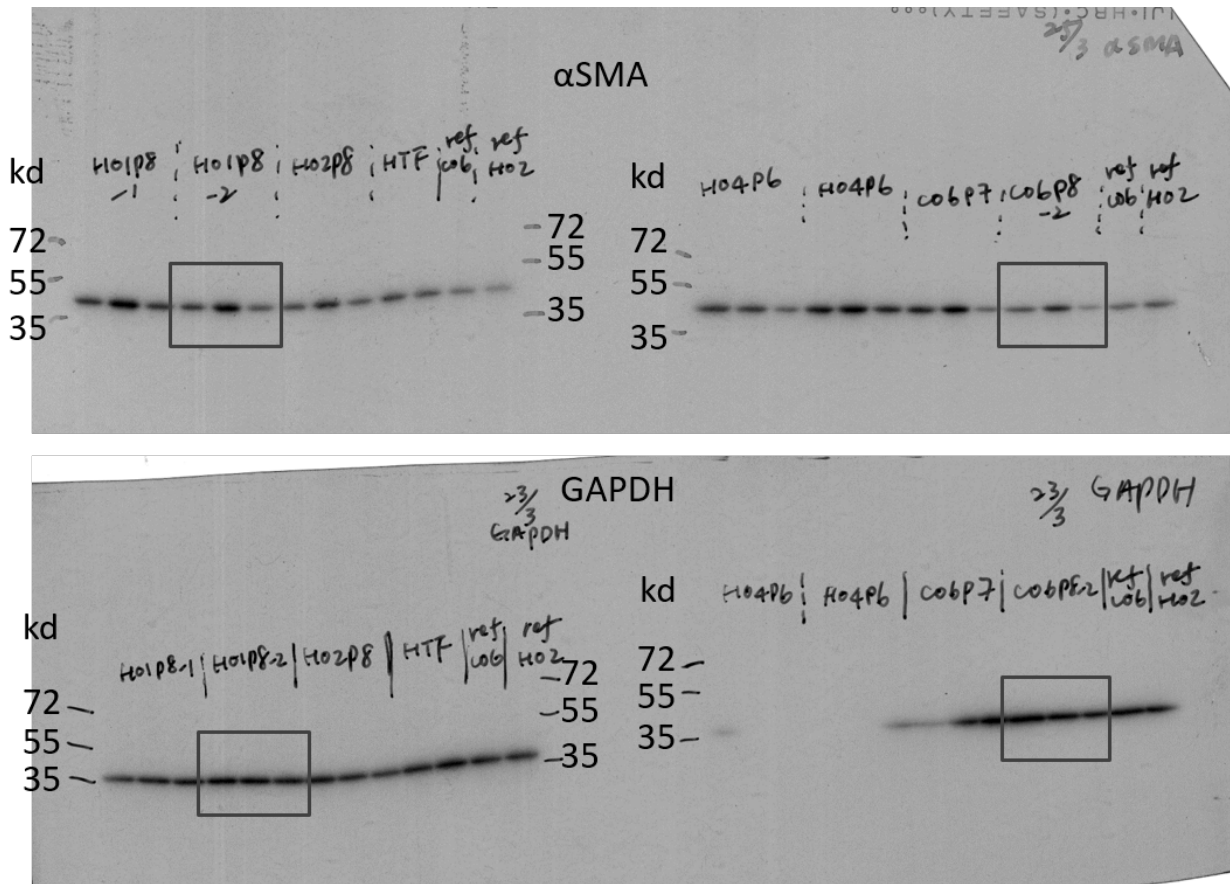

**Supplementary Figure S1.** Full-length Western blots of Figure 3B. Top panel was probed with  $\alpha$ SMA, and bottom panel was probed with GAPDH. For semi-quantitative analysis,  $\alpha$ SMA signals were normalized with GAPDH signals. Frames are the areas selected for representative images in Figure 3B. A loading control (ref HO2) was used for quantitative comparison between different blots.

Figure S2

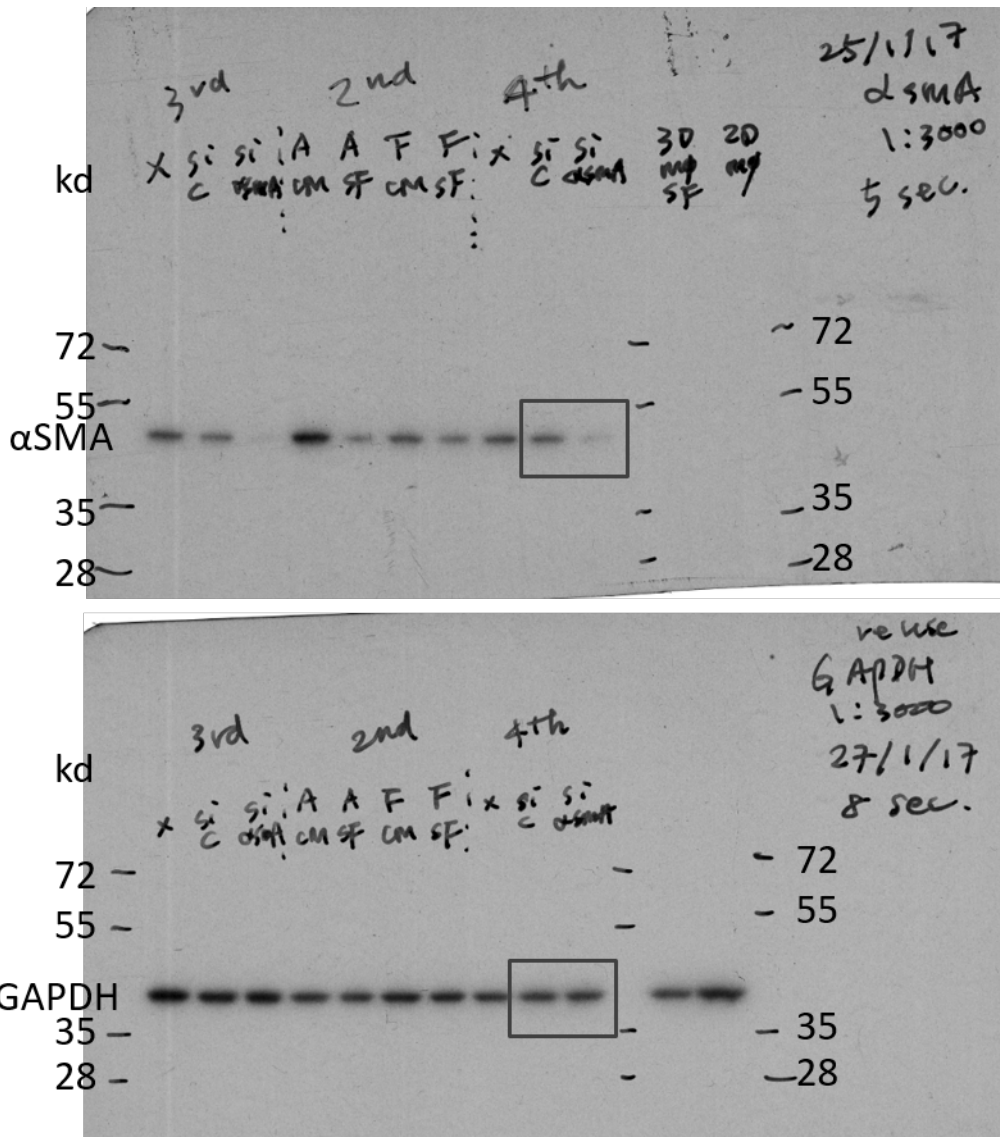

**Supplementary Figure S2.** Full-length Western blots of Figure 3C. Top panel was probed with  $\alpha$ SMA, and bottom panel was probed with GAPDH. For semi-quantitative analysis,  $\alpha$ SMA signals were normalized with GAPDH signals. Frames are the areas selected for representative images in Figure 3C.
